# Supplementary material for: Genomic Investigation into the Virulome, Pathogenicity, Stress Response Factors, Clonal Lineages, and Phylogenetic Relationship of Escherichia coli Strains Isolated from Meat Sources in Ghana
Source: PubMed Central journal article supplement (PMC7764966; doi:10.3390/genes11121504), 2020-12-14
Supplement: genes-11-01504-s001.pdf [file genes-11-01504-s001.pdf]

**Table S1.** Prevalence of *E. coli* in meat samples sold at the Tamale Metropolis.

| Sample        | No. of samples examined | <sup>a</sup> No. samples positive | <sup>b</sup> No. <i>E. coli</i> |
|---------------|-------------------------|-----------------------------------|---------------------------------|
| Beef          | 45                      | 39                                | 39                              |
| Chevon        | 45                      | 34                                | 34                              |
| Mutton        | 45                      | 40                                | 40                              |
| Local chicken | 45                      | 36                                | 36                              |
| Guinea fowl   | 45                      | 40                                | 40                              |
|               |                         |                                   |                                 |
| Overall       | 225                     | 189                               | 189                             |

<sup>a</sup>Number of samples positive for *E. coli*.

<sup>b</sup>One *E. Coli* isolate was selected from each positive sample.

**Table S2.** A table showing the eBURST (Based Upon Related Sequence Types) analyses of the study sequence types with global curated STs in *Escherichia* PubMLST database.

| MLST (Isolate)              | Type of clone                              | Closest global ancestry sequence type (ST) | Source                               |
|-----------------------------|--------------------------------------------|--------------------------------------------|--------------------------------------|
| ST69 (SG6)                  | Similar <sup>a</sup>                       | ST69                                       | Animal (Food),<br>Human              |
| ST155 (SLC2,<br>TLC13, CM4) | Similar                                    | ST155                                      | Animal (Food), Human,<br>Environment |
| ST297 (TLC1)                | Similar                                    | ST297                                      | Human                                |
| ST1727 (NC3)                | Similar                                    | ST1727                                     | Human                                |
| ST44 (AC1)                  | Single-Locus Variant<br>(SLV) <sup>b</sup> | ST10, ST752                                | Animal (Food),<br>Human              |
| ST469 (CC6)                 | Single-Locus Variant<br>(SLV)              | ST162                                      | Food                                 |
| ST540 (AB1,<br>TG1)         | Single-Locus Variant<br>(SLV)              | ST4093                                     | Human                                |
| ST1141 (NM11)               | Single-Locus Variant<br>(SLV)              | ST10, ST744                                | Animal (Food),<br>Human              |
| ST7473 (NB12)               | Single-Locus Variant<br>(SLV)              | ST10                                       | Animal (Food),<br>Human              |
| ST6646 (CB1)                | Satellite <sup>c</sup>                     | None                                       | -                                    |
| ST7483 (NB12)               | Satellite                                  | None                                       | -                                    |

<sup>a</sup> Similar: study isolate was similar to a global curated known sequence type.

<sup>b</sup> Single-Locus Variant (SLV): study isolate only shared similarity with global curated known sequence types that differed in one allelic gene.

<sup>c</sup> Satellite: study isolate as a distantly related and did not shared any similarity with global curated known sequence types.

**Table S3.** In silico identification and characterization of conserved stress response mechanisms in the *E. coli* strains.

| Type of Mechanisms                                         | Associated Proteins/Enzymes/Genes                                                                      |
|------------------------------------------------------------|--------------------------------------------------------------------------------------------------------|
| <b>Osmotic stress (n=14)</b>                               |                                                                                                        |
| a. Osmoregulation (4)                                      | Outer membrane protein A precursor                                                                     |
|                                                            | Aquaporin Z                                                                                            |
|                                                            | Osmotically inducible protein ( <i>OsmY</i> )                                                          |
|                                                            | Glycerol uptake facilitator protein                                                                    |
| b. Osmoprotectant ABC transporter (4)                      | Permease protein ( <i>YehY</i> )                                                                       |
|                                                            | Inner membrane protein ( <i>YehW</i> )                                                                 |
|                                                            | Binding protein ( <i>YehZ</i> )                                                                        |
|                                                            | ATP-binding subunit ( <i>YehX</i> )                                                                    |
| c. Synthesis of osmoregulated periplasmic glucans (3)      | Glucans biosynthesis protein C                                                                         |
|                                                            | Glucans biosynthesis protein D precursor                                                               |
|                                                            | Glucans biosynthesis protein G precursor                                                               |
| d. Choline and Betaine Uptake and Betaine Biosynthesis (3) | High-affinity choline uptake protein ( <i>BetT</i> )                                                   |
|                                                            | Choline dehydrogenase                                                                                  |
|                                                            | Betaine aldehyde dehydrogenase                                                                         |
| <b>Oxidative stress (n=38)</b>                             |                                                                                                        |
| a. Protection from Reactive Oxygen Species (3)             | Superoxide dismutase [Cu-Zn] precursor                                                                 |
|                                                            | Cytochrome <i>c551</i> peroxidase                                                                      |
|                                                            | Superoxide dismutase [Fe]                                                                              |
| b. Oxidative stress (9)                                    | Redox-sensitive transcriptional activator ( <i>SoxR</i> )                                              |
|                                                            | Superoxide dismutase [Cu-Zn] precursor                                                                 |
|                                                            | Paraquat-inducible protein B                                                                           |
|                                                            | Superoxide dismutase [Fe]                                                                              |
|                                                            | Ferric uptake regulation protein FUR                                                                   |
|                                                            | Superoxide dismutase [Mn]                                                                              |
|                                                            | Nitrite-sensitive transcriptional repressor ( <i>NsrR</i> )                                            |
|                                                            | Paraquat-inducible protein A                                                                           |
|                                                            | Fumarate and nitrate reduction regulatory protein                                                      |
| c. Glutathione: Biosynthesis and gamma-glutamyl cycle (3)  | Gamma-glutamyltranspeptidase                                                                           |
|                                                            | Glutathione synthetase                                                                                 |
|                                                            | Glutamate--cysteine ligase                                                                             |
| d. Glutathione: Non-redox reactions (10)                   | Glutathione S-transferase                                                                              |
|                                                            | Uncharacterized glutathione S-transferase-like protein                                                 |
|                                                            | Lactoylglutathione lyase                                                                               |
|                                                            | FIG005121: SAM-dependent methyltransferase                                                             |
|                                                            | Glutathione S-transferase, omega                                                                       |
|                                                            | Uncharacterized GST-like protein ( <i>yncG</i> )                                                       |
|                                                            | Uncharacterized GST-like protein <i>yghU</i> associated with glutathionylspermidine synthetase/amidase |
|                                                            | Hydroxyacylglutathione hydrolase                                                                       |
|                                                            | Probable glutathione S-transferase, <i>YfcF</i> homolog                                                |
|                                                            | Probable glutathione S-transferase, <i>YfcG</i> homolog                                                |

|                                                                     |                                                                                                        |
|---------------------------------------------------------------------|--------------------------------------------------------------------------------------------------------|
|                                                                     | Glutathione S-transferase (EC 2.5.1.18)                                                                |
| e. Glutathione: Redox cycle (6)                                     | Glutathione reductase                                                                                  |
|                                                                     | Glutaredoxin-like protein ( <i>NrdH</i> ), required for reduction of Ribonucleotide reductase class Ib |
|                                                                     | Glutathione peroxidase                                                                                 |
|                                                                     | Glutaredoxin 3 ( <i>Grx3</i> )                                                                         |
|                                                                     | Glutaredoxin 1                                                                                         |
|                                                                     | Glutaredoxin 2                                                                                         |
| f. Glutaredoxins (4)                                                | Glutaredoxin-like protein ( <i>NrdH</i> ), required for reduction of Ribonucleotide reductase class Ib |
|                                                                     | Glutaredoxin 3 ( <i>Grx3</i> )                                                                         |
|                                                                     | Glutaredoxin 1                                                                                         |
|                                                                     | Glutaredoxin 2                                                                                         |
| g. Glutathionylspermidine and Trypanothione (3)                     | Glutathionylspermidine amidohydrolase                                                                  |
|                                                                     | Uncharacterized GST-like protein <i>yghU</i> associated with glutathionylspermidine synthetase/amidase |
|                                                                     | Glutathionylspermidine synthase                                                                        |
| <b>Periplasmic stress (n=11)</b>                                    |                                                                                                        |
| a. Periplasmic Acid Stress Response in Enterobacteria (4)           | Transcriptional activator ( <i>GadE</i> )                                                              |
|                                                                     | Membrane transporter ( <i>HdeD</i> ), H-NS repressed                                                   |
|                                                                     | Chaperone ( <i>HdeA</i> )                                                                              |
|                                                                     | Chaperone ( <i>HdeB</i> )                                                                              |
| b. Periplasmic Stress Response (7)                                  | Sigma factor <i>RpoE</i> negative regulatory protein <i>RseA</i>                                       |
|                                                                     | Outer membrane stress sensor protease ( <i>DegS</i> )                                                  |
|                                                                     | Outer membrane protein H precursor                                                                     |
|                                                                     | Intramembrane protease ( <i>RasP/YluC</i> )                                                            |
|                                                                     | Sigma factor <i>RpoE</i> negative regulatory protein <i>RseB</i> precursor                             |
|                                                                     | Outer membrane stress sensor protease <i>DegQ</i> , serine protease                                    |
|                                                                     | <i>HtrA</i> protease/chaperone protein                                                                 |
| <b>Detoxification (n=9)</b>                                         |                                                                                                        |
| a. Uptake of selenate and selenite (3)                              | Inner membrane transport protein ( <i>YbaT</i> )                                                       |
|                                                                     | Sulfate and thiosulfate import ATP-binding protein ( <i>CysA</i> )                                     |
|                                                                     | <i>DedA</i> protein                                                                                    |
| b. Tellurite resistance (Chromosomal determinants) (3)              | Uncharacterized membrane lipoprotein clustered with tellurite resistance proteins ( <i>TehA/TehB</i> ) |
|                                                                     | FIG005189: putative transferase clustered with tellurite resistance proteins ( <i>TehA/TehB</i> )      |
|                                                                     | Tellurite resistance protein ( <i>TehA</i> )                                                           |
| c. Glutathione-dependent pathway of formaldehyde detoxification (3) | S-formylglutathione hydrolase                                                                          |
|                                                                     | S-(hydroxymethyl)glutathione dehydrogenase                                                             |
|                                                                     | <i>FrmR</i> : Negative transcriptional regulator of formaldehyde detoxification operon                 |
